# Supplementary material for: Acute respiratory distress syndrome caused by Chlamydia psittaci: a case report and literature review
Source: PubMed Central journal article supplement (PMC11653191; doi:10.3389/fmed.2024.1418241), 2024-12-03
Supplement: Data_Sheet_1.pdf [file Data_Sheet_1.pdf]

Table S1. Comparison of the Survived and Deceased Patients in our literature review.

| Variables                                        | No. (%) of cases         |                         | <i>P</i> value |
|--------------------------------------------------|--------------------------|-------------------------|----------------|
|                                                  | Survived<br>group (n=62) | Deceased<br>group (n=6) |                |
| <b>Clinical symptoms on the day of admission</b> |                          |                         |                |
| Cough                                            | 32(51.6)                 | 5(83.3)                 | 0.209          |
| Fever                                            | 57(91.9)                 | 5(83.3)                 | 0.438          |
| Dyspnea                                          | 43(69.4)                 | 5(83.3)                 | 0.662          |
| Headache                                         | 16(25.8)                 | 2(33.3)                 | 0.652          |
| Diarrhea                                         | 4(6.5)                   | 0(0.0)                  | 1.000          |
| Backache                                         | 1(1.6)                   | 0(0.0)                  | 1.000          |
| Myalgia                                          | 10(16.1)                 | 1(16.7)                 | 1.000          |
| Chest pain                                       | 2(3.2)                   | 0(0.0)                  | 1.000          |
| Confusion                                        | 2(3.2)                   | 0(0.0)                  | 1.000          |
| Hemoptysis                                       | 4(6.5)                   | 0(0.0)                  | 1.000          |
| Chills                                           | 1(1.6)                   | 0(0.0)                  | 1.000          |
| Shiver                                           | 5(8.1)                   | 1(16.7)                 | 0.438          |
| Weakness                                         | 10(16.1)                 | 0(0.0)                  | 0.581          |
| Poor appetite                                    | 10(16.1)                 | 0(0.0)                  | 0.581          |
| <b>Complications</b>                             |                          |                         |                |
| Hepatic dysfunction                              | 52(83.9)                 | 6(100.0)                | 0.581          |
| Renal dysfunction                                | 8(12.9)                  | 5(83.3)                 | <b>0.001</b>   |
| Neurological symptoms                            | 9(14.5)                  | 3(50.0)                 | 0.063          |
| Cardiac damage                                   | 17(27.4)                 | 2(33.3)                 | 1.000          |
| Gastrointestinal symptoms                        | 3(4.8)                   | 0(0.0)                  | 1.000          |
| Pulmonary embolism                               | 8(12.9)                  | 0(0.0)                  | 1.000          |
| <b>ECMO</b>                                      | 5(8.1)                   | 0(0.0)                  | 1.000          |
